# Supplementary material for: Contribution of nitrogen configurations to the adsorption of Cd(ii) in nitrogen-enriched biochar
Source: Royal Society of Chemistry journal article supplement (doi:10.1039/d1nj01084k), 2021-01-01
Supplement: d1nj01084k1.pdf [file d1nj01084k1.pdf]

**Table S1.** Fitting parameters for the kinetic equations that describe Cd (II) adsorption on NBCs

| Adsorbent    | pseudo-first-order |        |       | pseudo-second-order |                      |       |
|--------------|--------------------|--------|-------|---------------------|----------------------|-------|
|              | $q_e(\text{mg/g})$ | $k_1$  | $r^2$ | $q_e(\text{mg/g})$  | $k_2 \times 10^{-3}$ | $r^2$ |
| Pr-NBC+20ppm | 6.41               | 0.0049 | 0.787 | 7.22                | 0.193                | 0.853 |
| Pd-NBC+20ppm | 12.24              | 0.0034 | 0.959 | 14.97               | 0.239                | 0.962 |
| Gp-NBC+20ppm | 16.57              | 0.0123 | 0.944 | 18.43               | 0.896                | 0.971 |
| Pr-NBC+50ppm | 13.95              | 0.0027 | 0.983 | 17.86               | 0.140                | 0.984 |
| Pd-NBC+50ppm | 17.93              | 0.0026 | 0.983 | 24.33               | 0.101                | 0.985 |
| Gp-NBC+50ppm | 29.64              | 0.0038 | 0.993 | 36.51               | 0.106                | 0.993 |

**Table S2.** Fitting parameters for the Langmuir and Freundlich isotherms for Cd (II) adsorption by NBCs and pristine biochars

| Adsorbent | Langmuir               |                  |       | Freundlich                          |       |       |
|-----------|------------------------|------------------|-------|-------------------------------------|-------|-------|
|           | $q_{max}(\text{mg/g})$ | $b(\text{L/mg})$ | $r^2$ | $K_F(\text{mg}^{1+n}/\text{g/L}^n)$ | $n$   | $r^2$ |
| Pr-NBC    | 12.68                  | 0.085            | 0.968 | 3.02                                | 0.277 | 0.957 |
| Pd-NBC    | 24.04                  | 0.357            | 0.990 | 9.10                                | 0.249 | 0.988 |
| Gp-NBC    | 35.95                  | 0.468            | 0.973 | 13.94                               | 0.261 | 0.962 |
| 700-BC    | 11.98                  | 0.095            | 0.962 | 3.43                                | 0.296 | 0.983 |
| 800-BC    | 15.82                  | 0.110            | 0.924 | 3.80                                | 0.325 | 0.982 |
| 900-BC    | 11.01                  | 0.213            | 0.881 | 4.17                                | 0.226 | 0.997 |

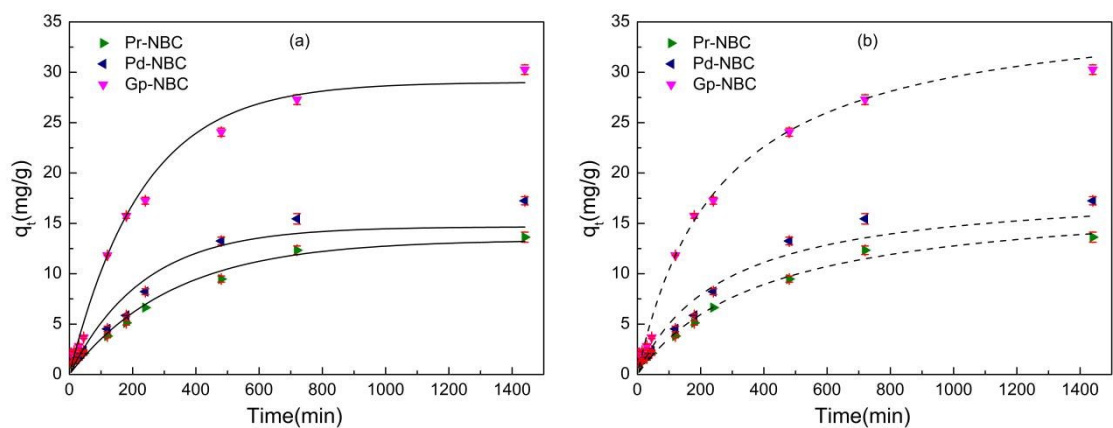

**Fig.S1.** Adsorption kinetics of 50 mg/L Cd(II) on NBCs (a): pseudo-first-order model; (b) : pseudo-second-order model

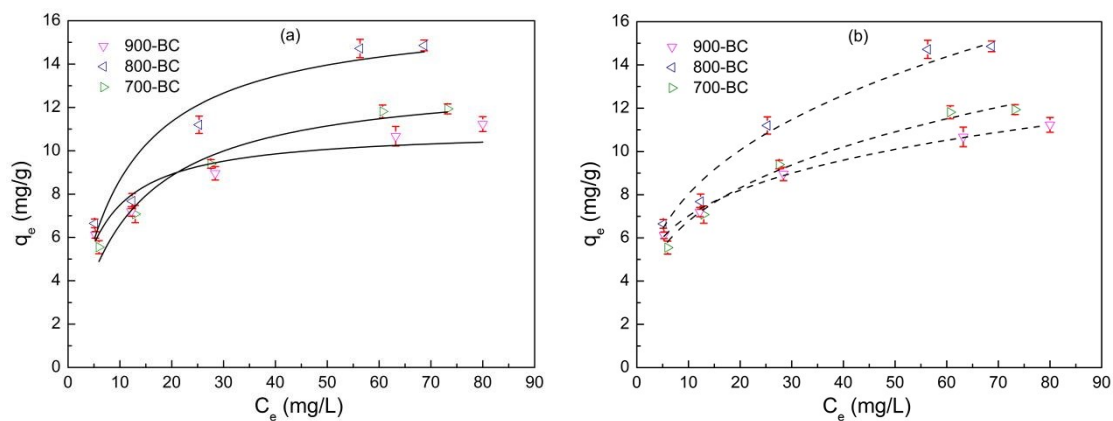

**Fig.S2.** Adsorption isotherm of Cd(II) on pristine BCs (a): Langmuir model; (b): Freundlich model.

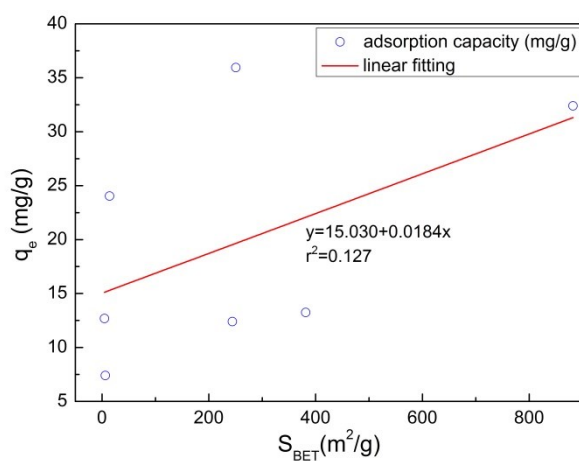

**Fig.S3.** The correlations of adsorption capacity ( $q_e$ , mg/g) with  $S_{BET}$  ( $m^2/g$ )

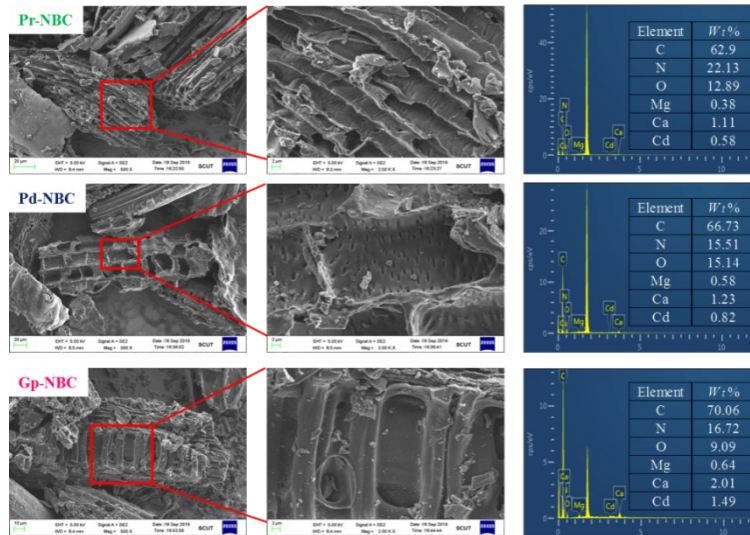

Fig.S4. SEM images and element relative content of NBCs' surface

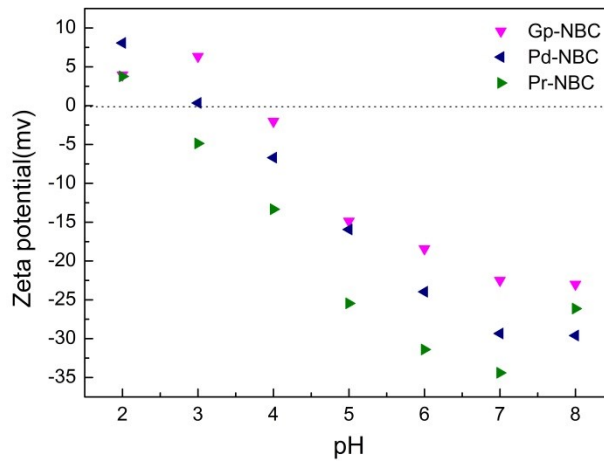

Fig. S5. Zeta potential of NBCs (pH from 2 to 8)

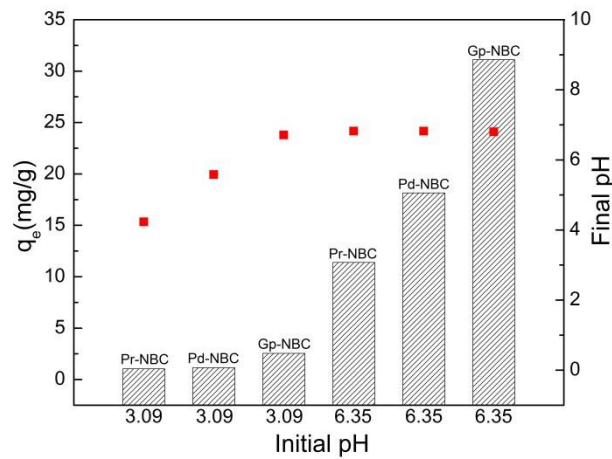

Fig. S6. Influence of initial pH on adsorption (red points represent pH after adsorption, and the columns represent adsorption capacities)

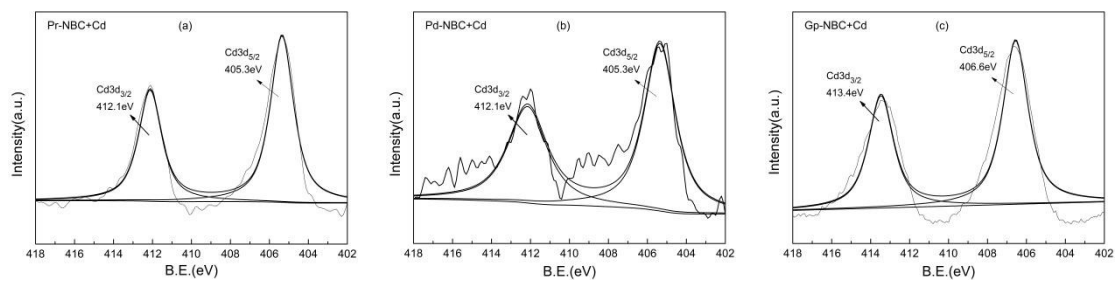

**Fig. S7.** High resolution XPS spectra of Cd3d on NBCs after adsorption
